# Supplementary material for: Magnetic Properties of Novel Layered Disulfides CuCr0.99Ln0.01S2 (Ln = La…Lu)
Source: MDPI journal article supplement (doi:10.3390/ma14175101), 2021-09-06
Supplement: s1 [file s1]

## Supplementary

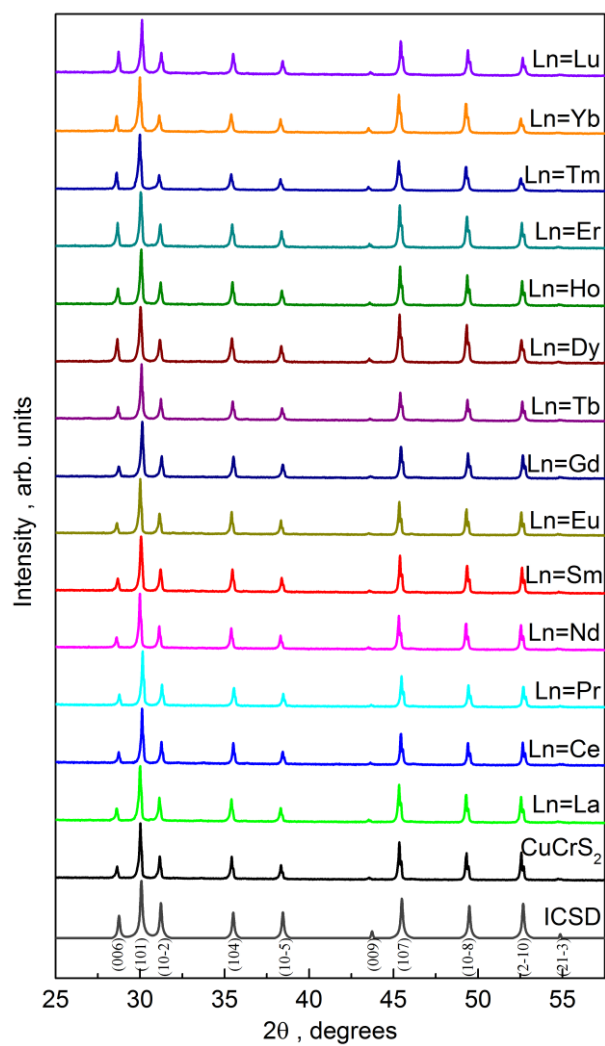

**Figure S1.** Powder diffraction patterns of CuCrS<sub>2</sub>-matrix and CuCr<sub>0.99</sub>Ln<sub>0.01</sub>S<sub>2</sub> solid solutions.

**Table S1.** Lattice parameters of  $\text{CuCr}_{0.99}\text{Ln}_{0.01}\text{S}_2$ .

| Ln                 | a, Å    | c, Å     | Ln | a, Å    | c, Å     | Ln | a, Å    | c, Å     |
|--------------------|---------|----------|----|---------|----------|----|---------|----------|
| CuCrS <sub>2</sub> | 3.48(3) | 18.71(6) | Sm | 3.47(9) | 18.68(6) | Ho | 3.47(7) | 18.68(1) |
| La                 | 3.48(2) | 18.70(0) | Eu | 3.47(9) | 18.68(5) | Er | 3.47(8) | 18.68(2) |
| Ce                 | 3.48(0) | 18.69(2) | Gd | 3.48(0) | 18.69(6) | Tm | 3.47(8) | 18.67(4) |
| Pr                 | 3.48(2) | 18.70(1) | Tb | 3.48(0) | 18.69(6) | Yb | 3.47(0) | 18.66(9) |
| Nd                 | 3.48(0) | 18.68(8) | Dy | 3.48(0) | 18.67(8) | Lu | 3.47(8) | 18.69(0) |

**Table S2.** Elemental composition of  $\text{CuCr}_{0.99}\text{Ln}_{0.01}\text{S}_2$ .

|                                                | Mean element concentration, mass% |      |     |      | Reference concentration, mass% |      |     |      |
|------------------------------------------------|-----------------------------------|------|-----|------|--------------------------------|------|-----|------|
|                                                | Cu                                | Cr   | Ln  | S    | Cu                             | Cr   | Ln  | S    |
| CuCrS <sub>2</sub>                             | 35.7                              | 29.4 | 0.0 | 34.9 | 35.4                           | 28.9 | 0.0 | 35.7 |
| $\text{CuCr}_{0.99}\text{La}_{0.01}\text{S}_2$ | 35.6                              | 29.9 | 0.8 | 33.7 | 35.2                           | 28.5 | 0.8 | 35.5 |
| $\text{CuCr}_{0.99}\text{Ce}_{0.01}\text{S}_2$ | 35.1                              | 30.0 | 0.7 | 34.2 | 35.2                           | 28.5 | 0.8 | 35.5 |
| $\text{CuCr}_{0.99}\text{Pr}_{0.01}\text{S}_2$ | 35.1                              | 29.4 | 0.8 | 34.7 | 35.2                           | 28.5 | 0.8 | 35.5 |
| $\text{CuCr}_{0.99}\text{Nd}_{0.01}\text{S}_2$ | 35.1                              | 29.0 | 0.8 | 35.0 | 35.2                           | 28.5 | 0.8 | 35.5 |
| $\text{CuCr}_{0.99}\text{Sm}_{0.01}\text{S}_2$ | 35.7                              | 29.3 | 0.6 | 34.5 | 35.2                           | 28.5 | 0.8 | 35.5 |
| $\text{CuCr}_{0.99}\text{Eu}_{0.01}\text{S}_2$ | 34.4                              | 29.2 | 0.8 | 35.4 | 35.2                           | 28.5 | 0.8 | 35.5 |
| $\text{CuCr}_{0.99}\text{Gd}_{0.01}\text{S}_2$ | 35.5                              | 29.4 | 1.0 | 34.3 | 35.2                           | 28.5 | 0.9 | 35.5 |
| $\text{CuCr}_{0.99}\text{Tb}_{0.01}\text{S}_2$ | 35.3                              | 29.4 | 0.7 | 34.7 | 35.2                           | 28.5 | 0.9 | 35.5 |
| $\text{CuCr}_{0.99}\text{Dy}_{0.01}\text{S}_2$ | 35.4                              | 29.2 | 0.7 | 34.7 | 35.2                           | 28.5 | 0.9 | 35.5 |
| $\text{CuCr}_{0.99}\text{Ho}_{0.01}\text{S}_2$ | 36.1                              | 28.4 | 0.8 | 34.7 | 35.1                           | 28.5 | 0.9 | 35.5 |
| $\text{CuCr}_{0.99}\text{Er}_{0.01}\text{S}_2$ | 35.0                              | 30.0 | 1.0 | 35.0 | 35.1                           | 28.5 | 0.9 | 35.5 |
| $\text{CuCr}_{0.99}\text{Tm}_{0.01}\text{S}_2$ | 35.0                              | 29.4 | 0.8 | 34.8 | 35.1                           | 28.5 | 0.9 | 35.5 |
| $\text{CuCr}_{0.99}\text{Yb}_{0.01}\text{S}_2$ | 34.8                              | 29.1 | 0.8 | 34.8 | 35.1                           | 28.5 | 1.0 | 35.5 |
| $\text{CuCr}_{0.99}\text{Lu}_{0.01}\text{S}_2$ | 35.2                              | 29.5 | 0.8 | 34.3 | 35.1                           | 28.5 | 1.0 | 35.5 |
